# Supplementary material for: Synergistic Effect of S224P and N383D Substitutions in the PA of H5N1 Avian Influenza Virus Contributes to Mammalian Adaptation
Source: PubMed Central journal article supplement (PMC4441148; doi:10.1038/srep10510), 2015-05-22
Supplement: srep10510-s1.pdf [file srep10510-s1.pdf]

**Synergistic Effect of S224P and N383D Substitutions in the PA of H5N1 Avian Influenza Virus Contributes to Mammalian Adaptation**

Jiasheng Song, Jing Xu, Jianzhong Shi, Yanbing Li, Hualan Chen\*

State Key Laboratory of Veterinary Biotechnology, Harbin Veterinary Research Institute, Chinese Academy of Agricultural Sciences, 427 Maduan Street, Harbin 150001, People's Republic of China

**\*Correspondence:** Mailing address: Harbin Veterinary Research Institute, CAAS, 427 Maduan Street, Harbin 150001, People's Republic of China. Phone: 86-451-51997168. Fax: 86-451-51997166. E-mail: [chenhualan@caas.cn](mailto:chenhualan@caas.cn).

**Supplemental Table 1.** The natural isolates carrying the PA/224P+383D double mutations in the H5N1 and pdmH1N1 influenza A viruses <sup>a</sup>

| Virus strains                           | GenBank<br>accession number | Subtype | Host <sup>b</sup> | 627<br>/PB2 | 701<br>/PB2 | 590-591<br>/PB2 |
|-----------------------------------------|-----------------------------|---------|-------------------|-------------|-------------|-----------------|
| A/chicken/Anhui/39/2004                 | ADG59392.1                  | H5N1    | Avian             | E           | D           | GQ              |
| A/chicken/Gansu/44/2004                 | G59385.1                    | H5N1    | Avian             | E           | E           | GQ              |
| A/swine/Banten/UT3062/2005              | ADI46298.1                  | H5N1    | <b>Swine</b>      | E           | D           | GQ              |
| A/swine/Banten/UT3063/2005              | ADI46299.1                  | H5N1    | <b>Swine</b>      | E           | D           | GQ              |
| A/swine/Banten/UT2071/2005              | ADI46297.1                  | H5N1    | <b>Swine</b>      | E           | D           | GQ              |
| A/swine/Banten/UT3081/2005              | ADI46300.1                  | H5N1    | <b>Swine</b>      | E           | D           | GQ              |
| A/duck/Hubei/49/2005                    | ADG59383.1                  | H5N1    | Avian             | E           | D           | GQ              |
| A/goose/Shantou/18442/2005              | ABL08901.1                  | H5N1    | Avian             | E           | D           | GQ              |
| A/duck/Vietnam/NCVD06/2005              | ACI16726.1                  | H5N1    | Avian             | E           | D           | GQ              |
| A/duck/Guiyang/3996/2005                | ABL08960.1                  | H5N1    | Avian             | E           | D           | GQ              |
| A/Shanghai/1/2006                       | AEO89020.1                  | H5N1    | <b>Human</b>      | E           | D           | GQ              |
| A/Indonesia/CDC624/2006                 | ABI36341.1                  | H5N1    | <b>Human</b>      | E           | D           | GQ              |
| A/Indonesia/CDC623/2006                 | ABI36319.1                  | H5N1    | <b>Human</b>      | E           | D           | GQ              |
| A/Indonesia/569H/2006                   | ABW06126.1                  | H5N1    | <b>Human</b>      | E           | D           | GQ              |
| A/great_egret/Hong_Kong/807/2008        | ACJ26329.1                  | H5N1    | Avian             | E           | D           | GQ              |
| A/Cambodia/V0401301/2011                | AEN68823.1                  | H5N1    | <b>Human</b>      | E           | D           | GQ              |
| A/Cambodia/V0606311/2011                | AEN68825.1                  | H5N1    | <b>Human</b>      | K           | D           | GQ              |
| A/muscovy_duck/Vietnam/OIE_559/2011     | BAK39621.1                  | H5N1    | Avian             | E           | D           | GQ              |
| A/chicken/Bangladesh/12VIR_7140_16/2012 | AGG53006.1                  | H5N1    | Avian             | E           | D           | GQ              |
| A/California/04/2009                    | ACP44156.1                  | pdmH1N1 | Human             | E           | D           | SR              |
| A/California/07/2009                    | ACP44188.1                  | pdmH1N1 | Human             | E           | D           | SR              |
| A/California/08/2009                    | ACQ63248.1                  | pdmH1N1 | Human             | E           | D           | SR              |
| A/Fukuoka-C/1/2009                      | ACS69018.1                  | pdmH1N1 | Human             | E           | D           | SR              |
| A/Fukuoka-C/2/2009                      | ACS92576.1                  | pdmH1N1 | Human             | E           | D           | SR              |
| A/Fukuoka-C/3/2009                      | S92586.1                    | pdmH1N1 | Human             | E           | D           | SR              |
| A/Kagoshima/1/2009                      | ACT21990.1                  | pdmH1N1 | Human             | E           | D           | SR              |
| A/Scotland/Glasgow_420755/2009          | AFK14748.1                  | pdmH1N1 | Human             | E           | D           | SR              |
| A/Scotland/Glasgow_422823/2009          | AFK14763.1                  | pdmH1N1 | Human             | E           | D           | SR              |
| A/Brownsville/31H/2009                  | ACZ96926.1                  | pdmH1N1 | Human             | E           | D           | SR              |
| A/Brownsville/31OS/2009                 | ACZ96916.1                  | pdmH1N1 | Human             | E           | D           | SR              |
| A/England/201/2009                      | AEW10813.1                  | pdmH1N1 | Human             | E           | D           | SR              |
| A/Pensacola/INS213/2009                 | ADK32457.1                  | pdmH1N1 | Human             | E           | D           | SR              |
| A/Canada/GFA0402/2009                   | ADJ37270.1                  | pdmH1N1 | Human             | E           | D           | SR              |
| A/Mexico/InDRE3740/2011                 | AFJ05633.1                  | pdmH1N1 | Human             | E           | D           | SR              |
| A/Helsinki/490/2013                     | AGV75282.1                  | pdmH1N1 | Human             | E           | D           | SR              |

|                     |            |         |       |   |   |    |
|---------------------|------------|---------|-------|---|---|----|
| A/Helsinki/664/2013 | AGV74974.1 | pdmH1N1 | Human | E | D | SR |
| A/Helsinki/742/2013 | AGV74853.1 | pdmH1N1 | Human | E | D | SR |
| A/Helsinki/753/2013 | AGV74842.1 | pdmH1N1 | Human | E | D | SR |
| A/Helsinki/979/2013 | AGV74556.1 | pdmH1N1 | Human | E | D | SR |

---

<sup>a</sup> Sequence search and alignment were performed by the online service of the Influenza Research Database (<http://www.fludb.org>), in October 2014.

<sup>b</sup> Boldface type indicates the mammalian infection of the H5N1 influenza virus.
